# Supplementary material for: Magel2 truncation alters select behavioral and physiological outcomes in a rat model of Schaaf-Yang syndrome
Source: PubMed Central journal article supplement (PMC9922728; doi:10.1242/dmm.049829), 2023-02-03
Supplement: dmm-16-049829-s1.pdf [file dmm-16-049829-s1.pdf]

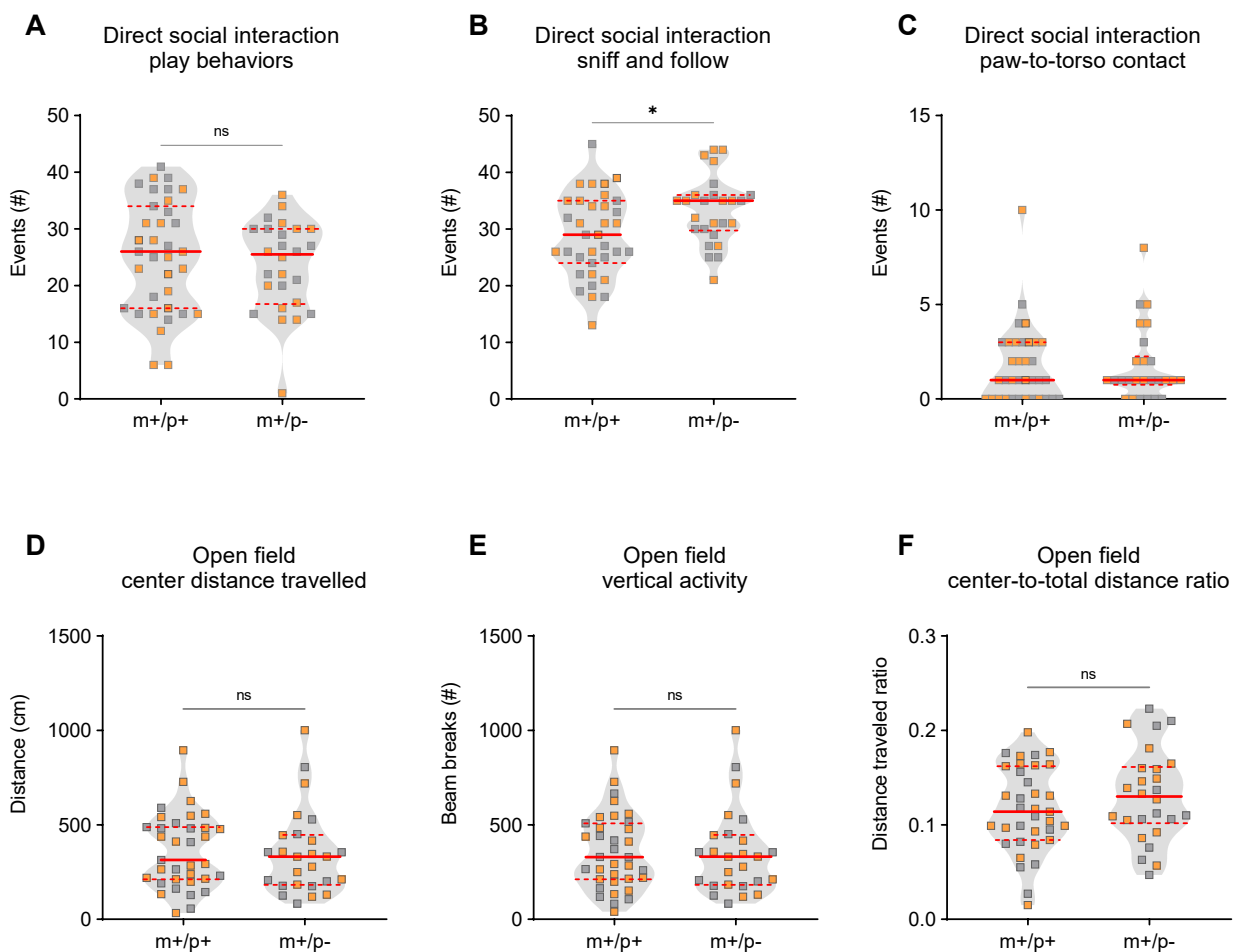

**Fig. S1. *Mage12*<sup>m+/p-</sup> rats display select alterations in dyadic social interaction, and normal performance in select parameters of the open field test.**

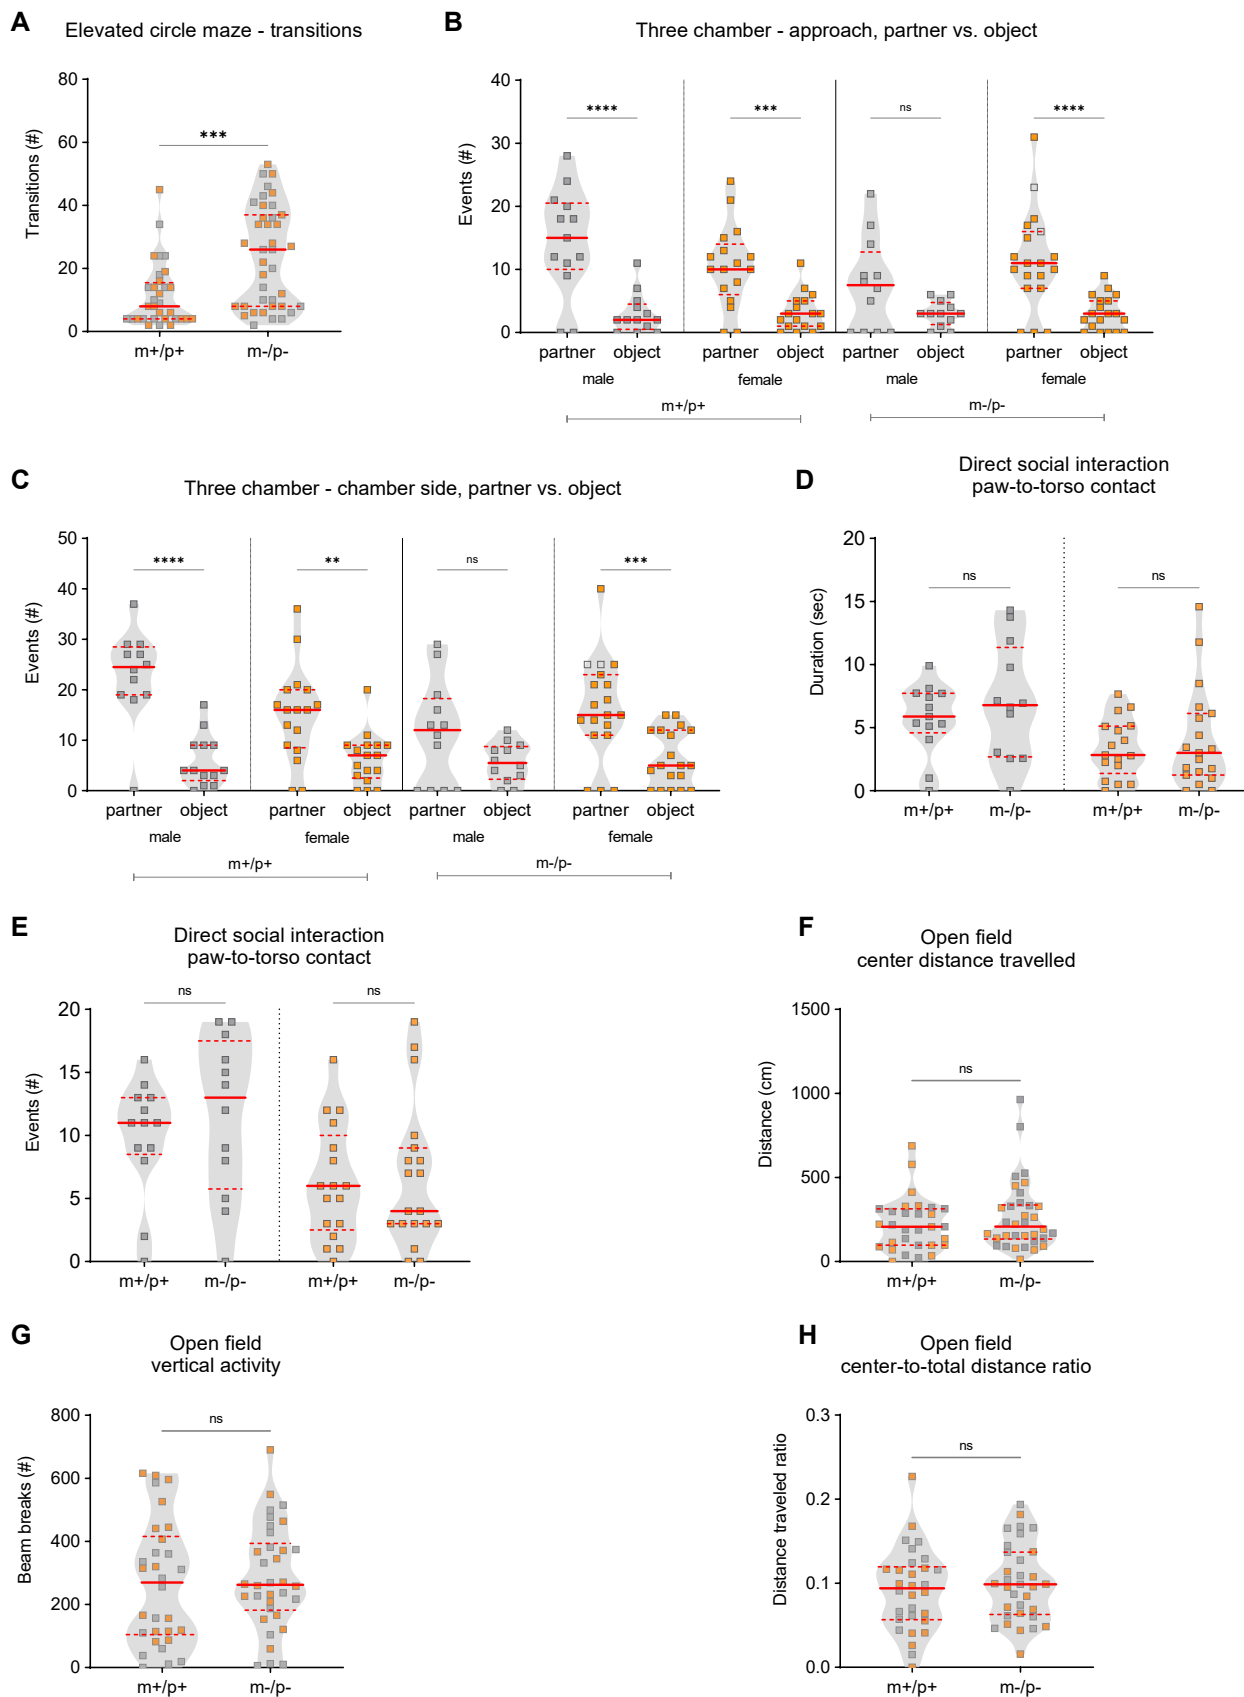

**Fig. S2. *Magel2*<sup>m-/p-</sup> rats display additional select alterations in anxiety-like behavior and social approach, normal generalized contact in dyadic social interaction tests, and normal performance in select parameters of the open field test.**

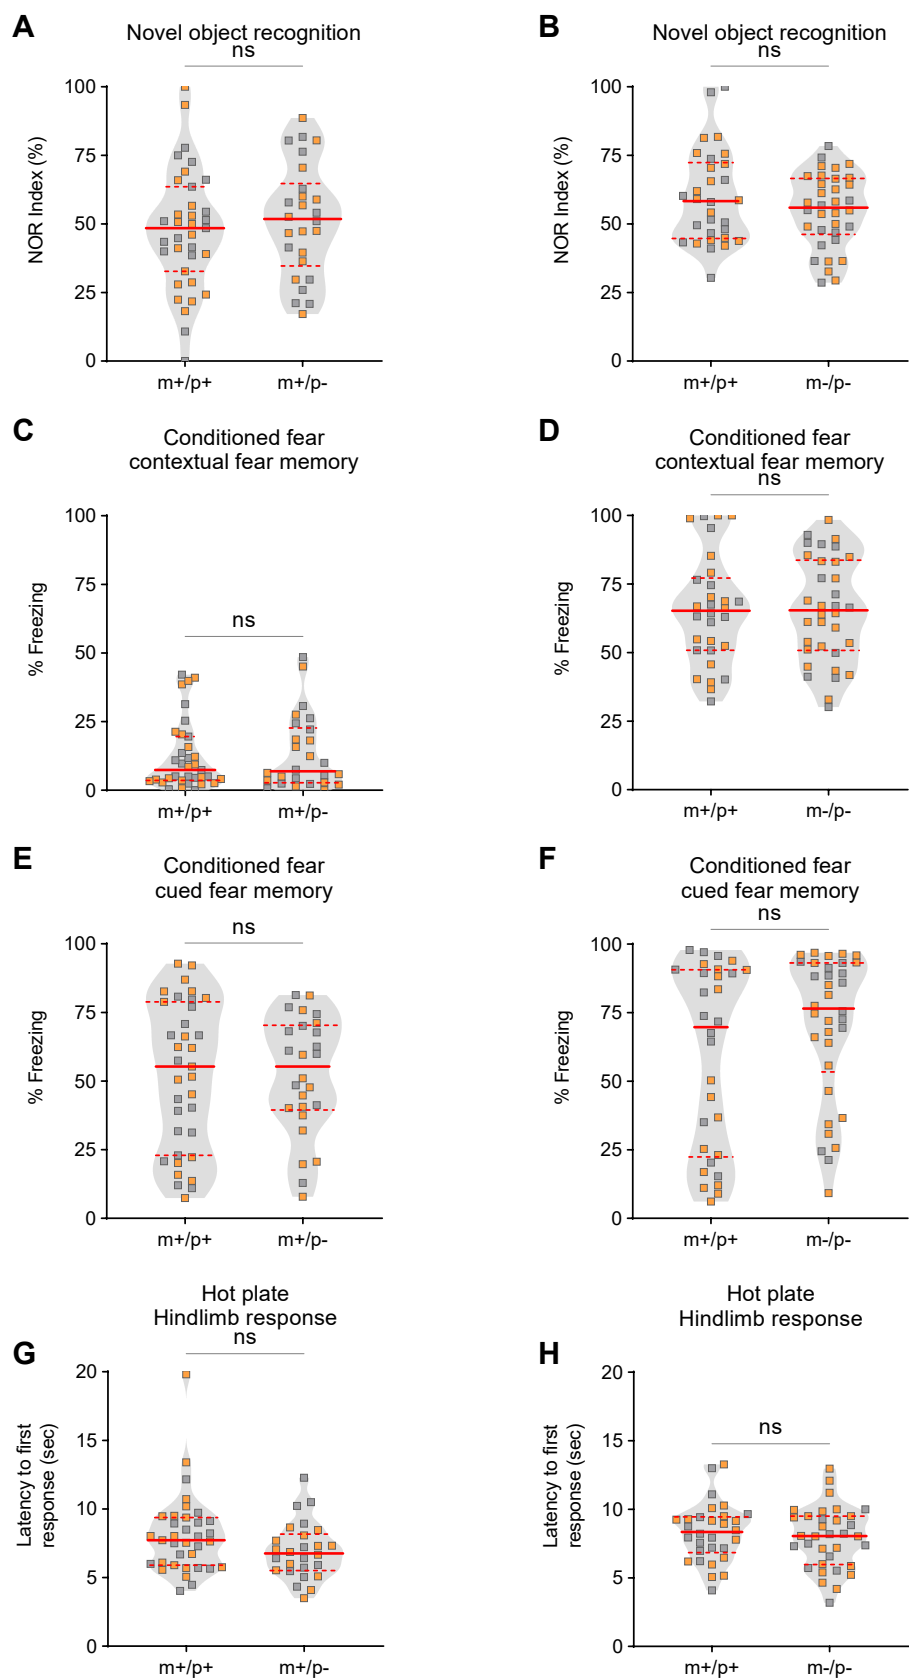

**Fig. S3. Novel object recognition, aversive fear memory and pain sensitivity do not appear altered in *Mage12* mutant rats.**

**Table S1. Statistical summary of behavioral data**

[Click here to download Table S1](#)

**Table S2. Statistical summary of organ systems physiology data**

[Click here to download Table S2](#)
